# Supplementary material
Source: PubMed Central journal article supplement (PMC4691682)
Supplement: supp_WNL.0000000000002199_Tables_e-1-2-Figure_e-1.pdf [file supp_WNL.0000000000002199_Tables_e-1-2-Figure_e-1.pdf]

## SUPPLEMENTAL MATERIAL

**Title:** IV thrombolysis in very severe and severe ischemic stroke: results from the SITS-ISTR registry.

**Authors:** Michael V Mazya, MD, PhD; Kennedy R Lees, MD, FRCP; David Collas, BSc, MB BS, FRCP; Viiu-Marika Rand, MD; Robert Mikulik, MD, PhD; Danilo Toni, MD, PhD; Nils Wahlgren, MD, PhD; Niaz Ahmed, MD, PhD.

### Online Supplement Table e-1.

Comparison of outcomes between patients with available and missing data on stroke territory.

| Characteristic or outcome | NIHSS $\geq 15$<br>known territory<br>n=4922 | NIHSS $\geq 15$ ,<br>missing territory<br>n=15941 | <i>P</i> |
|---------------------------|----------------------------------------------|---------------------------------------------------|----------|
| Any PH or PHr             | 508/4781 (10,6%)                             | 1667/15030 (11,1%)                                | 0,37     |
| PH2 or PHr2               | 233/4781 (4,9%)                              | 765/15030 (5,1%)                                  | 0,55     |
| SICH SITS-MOST            | 118/4777 (2,5%)                              | 373/15211 (2,5%)                                  | 0,94     |
| SICH ECASS II             | 391/4673 (8,4%)                              | 1315/14742 (8,9%)                                 | 0,24     |
| SICH NINDS                | 518/4692 (11,0%)                             | 1723/14799 (11,6%)                                | 0,26     |
| mRS 0-1                   | 600/3492 (17,2%)                             | 2145/12973 (16,5%)                                | 0,36     |
| mRS 0-2                   | 1023/3492 (29,3%)                            | 3654/12973 (28,2%)                                | 0,19     |
| mRS 0-3                   | 1551/3492 (44,4%)                            | 5611/12973 (43,4%)                                | 0,22     |
| Dead 3m                   | 987/3529 (28,0%)                             | 3673/13160 (27,9%)                                | 0,95     |

Any PH or PHr: any parenchymal hemorrhage, local or remote, on any scan within 22-36 hours from treatment. PH2 or PHr2: local or remote parenchymal hemorrhage type 2. SICH: symptomatic intracerebral hemorrhage; SITS-MOST: Safe Implementation of Thrombolysis in Stroke Monitoring Study. ECASS II: European Cooperative Acute Stroke Study II; NINDS: National Institute of Neurological Diseases and Stroke; mRS: modified Rankin Scale at three months. 3m: within three months. All comparisons done using the Pearson Chi<sup>2</sup> test.

### Supplemental Figure e-1 Legend

Frequency of functional outcomes and death at three months by stroke severity strata.

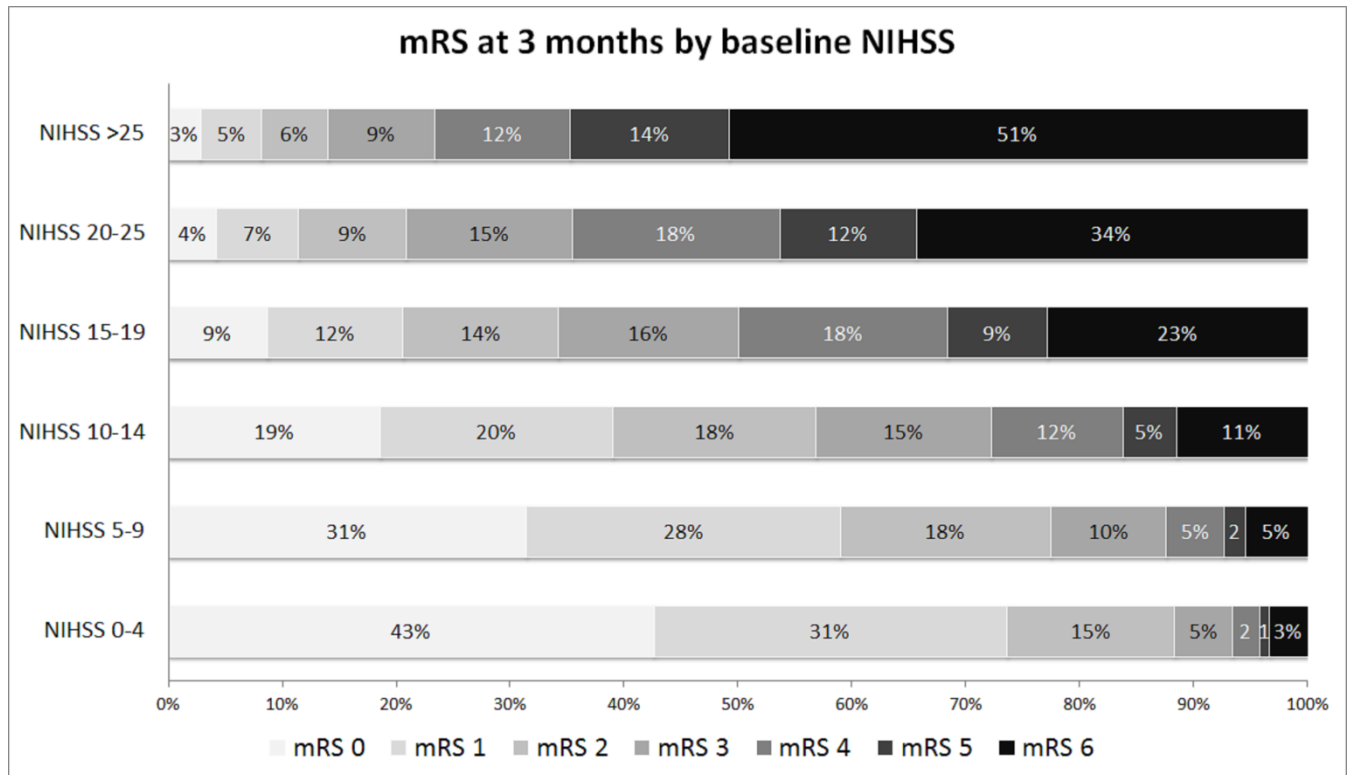

mRS: modified Rankin Scale.

**Online Supplement Table e-2.**

Frequency of PH and SICH by circulation territory and stroke severity.

| ICH/SICH type  | NIHSS >25, posterior   | NIHSS >25, anterior   | p      |
|----------------|------------------------|-----------------------|--------|
|                | n (%)                  | n(%)                  |        |
| Any PH or PHr  | 3/72 (4,2%)            | 12/136 (8,2%)         | 0.22   |
| PH2 or PHr2    | 1/72 (1.4%)            | 4/136 (2.9%)          | 0.49   |
| SICH SITS-MOST | 0/73 (0%)              | 0/134 (0%)            | 1.0    |
| SICH ECASS II  | 6/72 (8.3%)            | 16/131 (12.2%)        | 0.39   |
| SICH NINDS     | 6/72 (8.3%)            | 20/133 (15.0%)        | 0.17   |
|                | NIHSS 15-25, posterior | NIHSS 15-25, anterior | p      |
|                | n (%)                  | n (%)                 |        |
| Any PH or PHr  | 27/338 (8.0%)          | 466/4235 (11.0%)      | 0.086  |
| PH2 or PHr2    | 11/338 (3.3%)          | 217/4273 (5.1%)       | 0.13   |
| SICH SITS-MOST | 5/341 (1.5%)           | 113/4229 (2.7%)       | 0.18   |
| SICH ECASS II  | 17/336 (5.1%)          | 352/4134 (8.5%)       | 0.027  |
| SICH NINDS     | 18/337 (5.3%)          | 474/4150 (11.4%)      | <0.001 |

Any PH or PHr: any parenchymal hemorrhage, local or remote, on any scan within 22-36 hours from treatment. PH2 or PHr2: local or remote parenchymal hemorrhage type 2. SICH: symptomatic intracerebral hemorrhage; SITS-MOST: Safe Implementation of Thrombolysis in Stroke Monitoring Study. ECASS II: European Cooperative Acute Stroke Study II; NINDS: National Institute of Neurological Diseases and Stroke; All comparisons done using the Pearson Chi<sup>2</sup> test.
